# Supplementary figures and images for: Soft-templated synthesis of hierarchical micro- and mesoporous Zn/Co bimetallic zeolitic imidazolate frameworks
Source: Royal Society of Chemistry journal article supplement (doi:10.1039/d5cc01006c), 2025-01-01

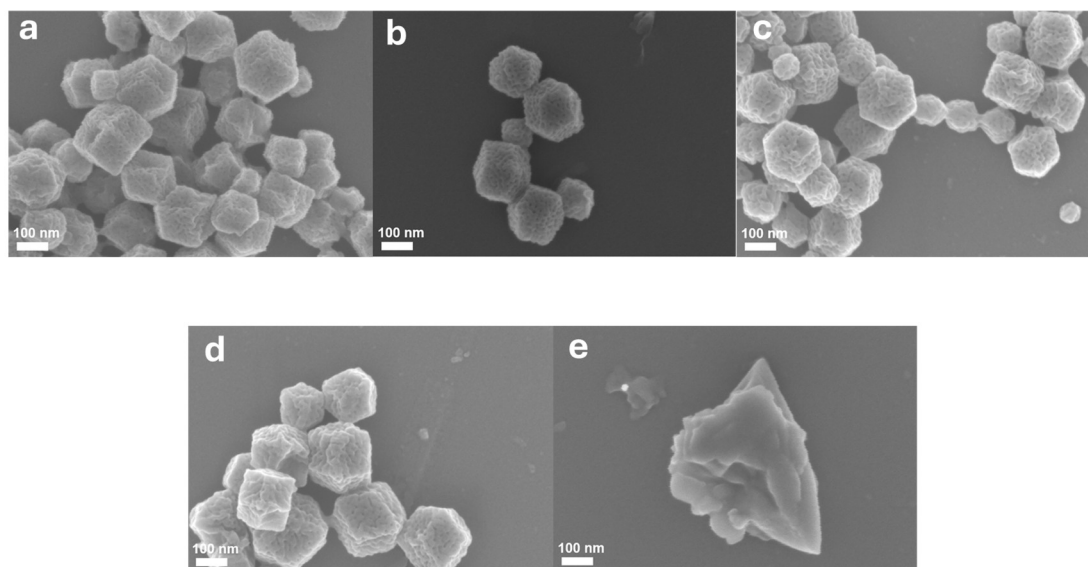

Supplement: d5cc01006c12.pdf [file d5cc01006c12.pdf]

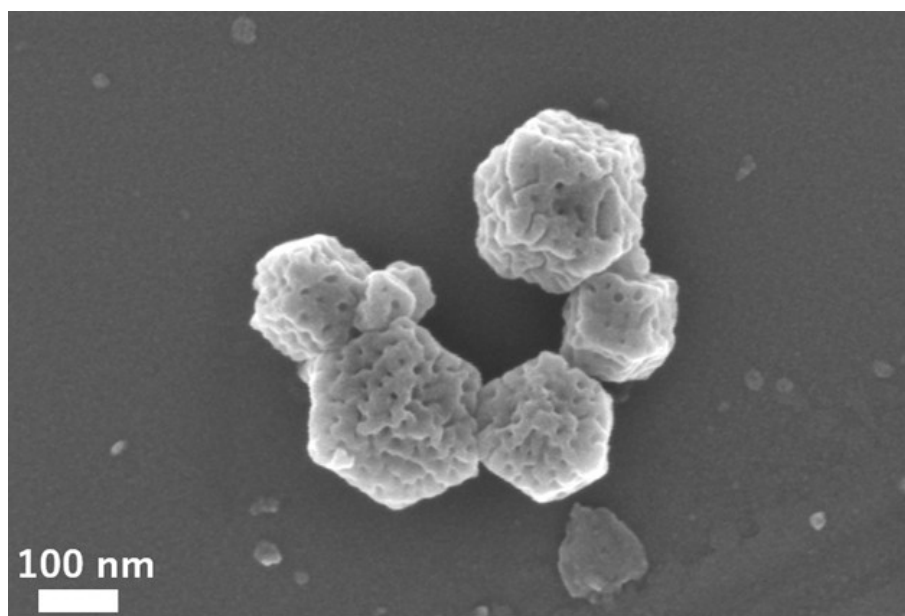

Supplement: d5cc01006c13.pdf [file d5cc01006c13.pdf]

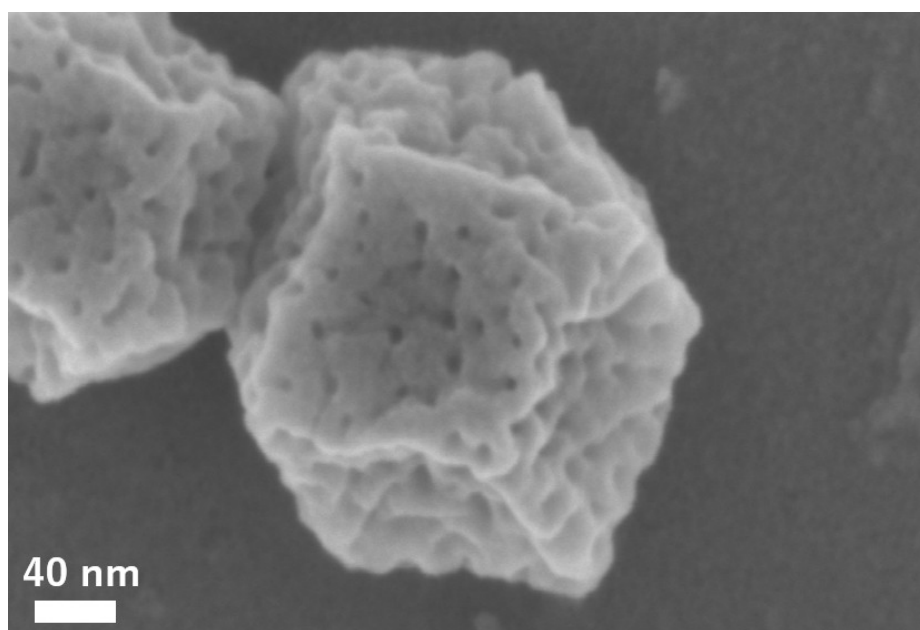

Supplement: d5cc01006c14.pdf [file d5cc01006c14.pdf]

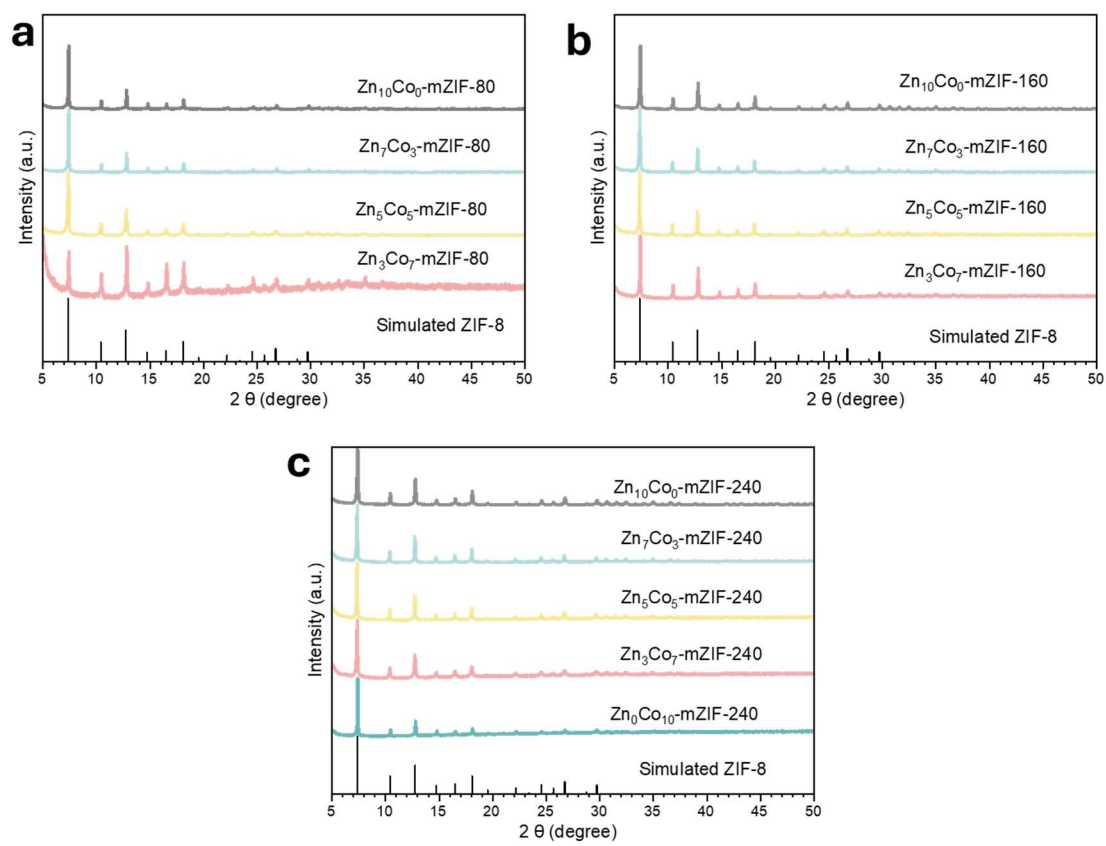

Supplement: d5cc01006c2.pdf [file d5cc01006c2.pdf]

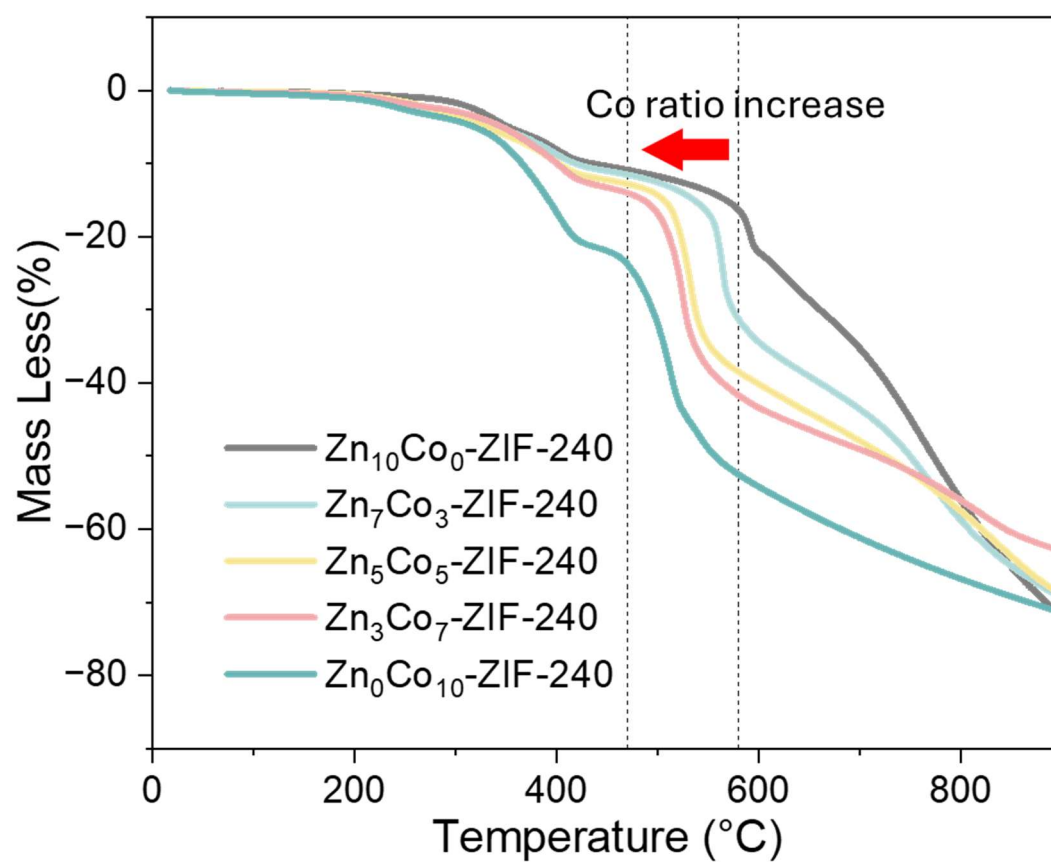

Supplement: d5cc01006c3.pdf [file d5cc01006c3.pdf]

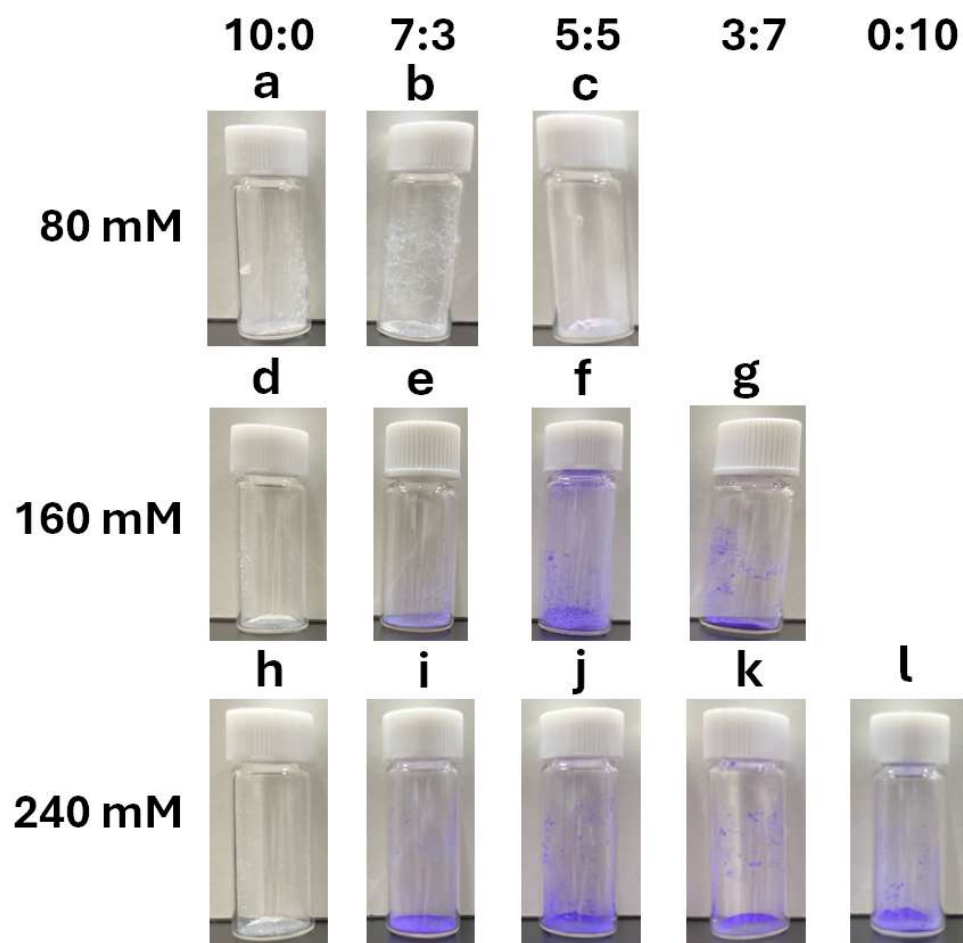

Supplement: d5cc01006c4.pdf [file d5cc01006c4.pdf]

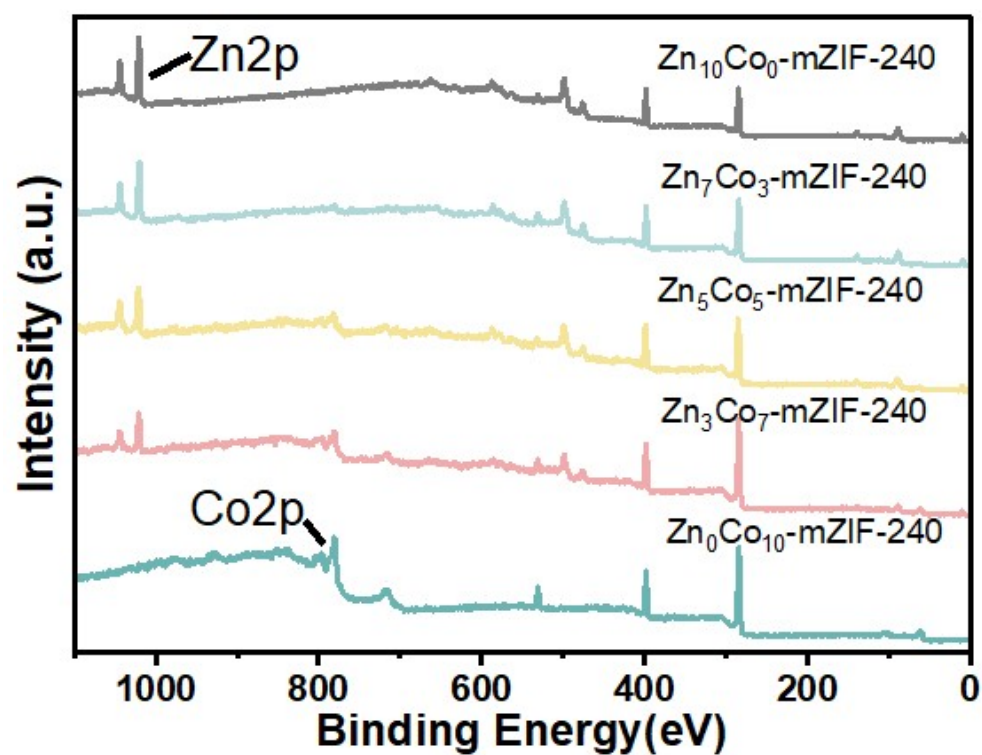

Supplement: d5cc01006c5.pdf [file d5cc01006c5.pdf]
